# Supplementary material for: Flavoenzyme CrmK-mediated substrate recycling in caerulomycin biosynthesis
Source: PubMed Central journal article supplement — Chem Sci. 2016 Apr 13;7(8):4867–74. doi: 10.1039/c6sc00771f (PMC6016722; doi:10.1039/c6sc00771f), 2016-04-13
Supplement: SC-007-C6SC00771F-s001.pdf [file SC-007-C6SC00771F-s001.pdf]

## Supplementary Information

### Flavoenzyme CrmK-Mediated Substrate Recycling in Caerulomycin Biosynthesis†

Yiguang Zhu,‡<sup>a</sup> Marie-Ève Picard,‡<sup>b</sup> Qingbo Zhang,<sup>a</sup> Julie Barma,<sup>b</sup> Xavier Murphy  
Després,<sup>b</sup> Xiangui Mei,<sup>c</sup> Liping Zhang,<sup>a</sup> Jean-Baptiste Duvignaud,<sup>b</sup> Manon Couture,<sup>b</sup>  
Weiming Zhu,<sup>c</sup> Rong Shi,<sup>b\*</sup> and Changsheng Zhang<sup>a\*</sup>

<sup>a</sup>CAS Key Laboratory of Tropical Marine Bio-resources and Ecology, Guangdong Key Laboratory of Marine  
Materia Medica, RNAM Center for Marine Microbiology, South China Sea Institute of Oceanology, Chinese  
Academy of Sciences, 164 West Xingang Road, Guangzhou 510301, P.R. China;

<sup>b</sup>Département de biochimie, de microbiologie et de bio-informatique, PROTEO, and Institut de Biologie  
Intégrative et des Systèmes (IBIS), Université Laval, Québec, G1V 0A6, Canada;

<sup>c</sup>Key Laboratory of Marine Drugs, Chinese Ministry of Education, School of Medicine and Pharmacy, Ocean  
University of China, Qingdao 266003, China.

‡These authors contributed equally.

Equal Correspondence to C. Z. ([czhang2006@gmail.com](mailto:czhang2006@gmail.com)) for biochemistry or R. S.  
([rong.shi@bcm.ulaval.ca](mailto:rong.shi@bcm.ulaval.ca)) for structure.

## Content

|                                                                                                           |     |
|-----------------------------------------------------------------------------------------------------------|-----|
| <b>Supplementary Materials and Methods</b> .....                                                          | S3  |
| Bacterial strains, plasmids, and reagents .....                                                           | S3  |
| General HPLC Analysis .....                                                                               | S3  |
| Cloning, Overexpression and Purification of CrmK .....                                                    | S3  |
| Site-directed Mutagenesis of <i>crmK</i> and Purification of CrmK Mutants .....                           | S4  |
| Biochemical assays of CrmK and Mutants.....                                                               | S4  |
| Enzymatic Preparation and Isolation of CRM R 10 .....                                                     | S5  |
| Crystallization, Data Collection and Refinement .....                                                     | S5  |
| <b>Table S1</b> Strains and plasmids used and generated in this study.....                                | S7  |
| <b>Table S2</b> Primers used in this study. ....                                                          | S8  |
| <b>Fig. S1</b> Alignment of CrmK with bi-covalent flavinproteins from diverse pathways .....              | S9  |
| <b>Fig. S2</b> SDS-PAGE analysis of the purification of CrmK .....                                        | S11 |
| <b>Fig. S3</b> LC-MS characterization of products of CrmK reactions with CRM P 7.....                     | S12 |
| <b>Fig. S4</b> <sup>1</sup> H and <sup>13</sup> C NMR spectroscopic data for CRM R 10 .....               | S13 |
| <b>Fig. S5</b> Conformational change of Tyr449 in CrmK upon substrate binding.....                        | S16 |
| <b>Fig. S6</b> MS data of CRM M 4 dissolved in H <sub>2</sub> O or H <sub>2</sub> <sup>18</sup> O .....   | S17 |
| <b>Fig. S7</b> Proposed catalytic mechanism with dual active site for AknOx .....                         | S19 |
| <b>Fig. S8</b> Superposition of active site residues in AknOx and CrmK.....                               | S20 |
| <b>Fig. S9</b> HPLC analysis of feeding experiments in the $\Delta$ <i>crmA</i> mutant with 7 and 8 ..... | S21 |
| <b>Fig. S10</b> Active site architecture of ClmD2.....                                                    | S22 |
| <b>Supplementary References</b> .....                                                                     | S23 |

## Supplemental Materials and Methods

**Bacterial strains, plasmids, and reagents.** Bacterial strains and plasmids used and constructed in this study are listed in Table S1. Chemicals, enzymes, and other molecular biological reagents were purchased from standard commercial sources and used according to the manufacturers' recommendations.

**General HPLC Analysis.** HPLC analysis for metabolites and enzyme assays was carried out on a reversed phase column Luna C18 (Phenomenex, 150 × 4.6 mm, 5 μm) with UV detection at 313 nm under the following program: solvent system (solvent A, 0.15% TFA in water; solvent B, 100% CH<sub>3</sub>CN); 5% B to 30% B (0 - 18 min), 30% B to 100% B (18 - 19 min), 100% B (19 - 24 min), 100% B to 5% B (24 - 25 min), 5% B (25 - 30 min); flow rate at 1 mL min<sup>-1</sup>.

**Cloning, Overexpression and Purification of CrmK.** The *crmK* gene was PCR amplified from the genomic DNA of *A. cyanogriseus* WH1-2216-6 using primers CrmK-EF and CrmK-ER (Table S2). PCR products were digested with *EcoRI/XhoI* and subsequently inserted into pET28a linearized with *EcoRI/XhoI*, to yield the plasmid pCSG2218 after sequence confirmation. The plasmid pCSG2218 were introduced to *E. coli* BL21(DE3) to produce the *N*-(His)<sub>6</sub>-tagged CrmK proteins. An overnight culture of transformed *E. coli* BL21(DE3)/pCSG2218 was used to inoculate 1 L TB medium and was grown at 37°C until the absorbance at 600 nm reached 0.6. Protein expression was induced with 100 μM isopropyl 1-thio-β-D-galactopyranoside (IPTG) followed by incubation at 18°C for 20 h. Cells were harvested and resuspended in lysis buffer (50 mM Tris-HCl, 200 mM NaCl, 5% glycerol, and 1 mM DTT, pH 8.0). An additional 5 mM imidazole was added to the lysis buffer and the overexpressed CrmK was purified by standard affinity chromatography using Ni<sup>2+</sup>-NTA affinity resin (Qiagen). The CrmK protein was eluted with buffer containing 50 mM Tris-HCl (pH 8), 200 mM NaCl, 5% glycerol, 250 mM imidazole, and 1 mM DTT. Following the desalting step to remove the imidazole, CrmK was further purified by size-exclusion chromatography (SEC) on

a Superdex 200 column (GE Healthcare) equilibrated in a buffer containing 20 mM Tris-HCl pH 8, 150 mM NaCl, 2% (v/v) glycerol, and 5mM DTT. The eluted fractions were pulled, concentrated for enzyme assays and crystallization.

**Site-directed Mutagenesis of *crmK* and Purification of CrmK Mutants.** Site-directed mutagenesis of *crmK* was carried out according to manufacturer's instructions (TransGen). Thirteen single CrmK mutants (H64A, F123A, C124A, Y138F, I328A R340A, E376A, I378A, F403A, F403E, M405A, Y446F, Y449F) and three double mutants (H64A/C124A, Y449F/Y138F, Y449F/F403E) were constructed and were confirmed by sequencing. The plasmids carrying the *crmK* mutated genes were introduced to *E. coli* BL21(DE3) for the purification of CrmK mutants according to the aforementioned methods.

**Biochemical assays of CrmK and Mutants.** The concentration of purified proteins was determined by the Bradford method.<sup>1</sup> The CrmK assays for CRM P 7 were conducted in 50  $\mu$ L reaction mixture in 50 mM Tris-HCl buffer (pH 8.0) containing 200  $\mu$ M CRM P 7, 240 nM CrmK at 28 °C, The CrmK assays for CRM F 8 were conducted in 50  $\mu$ L reaction mixture in 50 mM Tris-HCl buffer (pH 8.0) containing 200  $\mu$ M CRM F 8, 2.4  $\mu$ M CrmK at 28°C. For determining kinetic parameters, CRM P 7 was set as a variable substrate in concentrations of 5, 7.5, 10, 15, 20, 25, 50, 100, and 200  $\mu$ M. Enzyme assay was performed in Tris-Cl buffer (50 mM, pH 8.0) containing 12 nM CrmK at 28°C for 5 min in triplicates. Similarly, CRM M 4 was set as a variable substrate in concentrations of 500, 1000, 1500, 2000, 3000, 4000, 6000, and 8000  $\mu$ M for the determination of kinetic parameters.  $K_m$  and  $V_{max}$  were calculated by nonlinear regression analysis using Origin 9.0 software. The relative enzymatic activities of CrmK mutants were obtained by comparison of initial velocities with that of the wild type CrmK. To determine the initial velocity on CRM P 7, the assays were performed in Tris-HCl buffer (pH 8.0) containing 12 nM CrmK (or various mutants), 50  $\mu$ M CRM P 7 at 28°C for 5 min in triplicates. To determine the initial velocity on CRM M 4, the

assays were performed in 50 mM Tris-HCl buffer (pH 8.0) containing 240 nM CrmK (or various mutants), 5 mM CRM M 4 at 28°C for 5 min in triplicates. CrmK and mutants reactions were quenched by the addition of 50  $\mu$ L MeOH, and denatured proteins removed by centrifugation. The assays were monitored by HPLC analysis.

**Enzymatic Preparation and Isolation of CRM R 10.** A CrmK reaction was conducted in 100 mL mixture consisting of 50 mM Tris-HCl (pH 8.0), 8 mg CRM F 8, and 2.4  $\mu$ M CrmK upon incubation at 28 °C for 48 h. MeOH extracts of the reaction mixture were subjected to purification by semi-preparative HPLC on a Varian Star Workstation, using a reversed phase column Luna 5 $\mu$  Phenyl-Hexyl column (solvent A, 0.15% TFA in water; solvent B, 100% CH<sub>3</sub>CN; eluted with constant 20% solvent B; flow rate at 2.5 mL min<sup>-1</sup>) to obtain compound **10** (5 mg).

**Crystallization, Data Collection and Refinement.** Crystals of CrmK were obtained using the Classics II screen (Qiagen) through microbatch crystallization by mixing 0.7  $\mu$ L of protein (12 mg mL<sup>-1</sup>) with 0.5  $\mu$ L reservoir solution (0.96 M Sodium citrate pH 7.0). The crystals of CrmK bound with its substrate (CRM P 7) were obtained by soaking the CrmK crystals (~3 min) in the reservoir solution containing 5 mM CRM P 7, which was initially dissolved in DMSO at a stock concentration of 100 mM. For data collection, the crystals were flash cooled in the N<sub>2</sub> cold stream (Oxford Cryosystem, Oxford, UK) using 1.4 M Sodium Citrate pH 7.0 as cryoprotectant. Data for both CrmK-FAD and CrmK-FAD-CRM P complexes were collected to 1.84 Å and 2.15 Å, respectively, at a wavelength of 0.9795 Å at the CMCF1 beamline, Canadian Light Source. Both crystals belong to the space group P1 and are isomorphous with unit cell a=63.6, b=95.7, c=98.4 Å,  $\alpha$ =95.2°,  $\beta$ =97.0°,  $\gamma$ =104.4°. Data processing and scaling were performed with iMosflm.<sup>2</sup> The structure solution for the CrmK-FAD complex was obtained by molecular replacement through MolRep<sup>3</sup> using the structure of TamL<sup>4</sup> (PDB code 2Y08) as the search model. Several cycles of refinement using REFMAC<sup>5</sup> followed by

model rebuilding with Coot<sup>6</sup> were carried out. For the substrate-bound CrmK, guided by the Fourier difference map, the substrate molecule was placed in the model after the rebuilding of the protein part was finished. Except the first 2-3 residues at the N-terminal, all the residues in the sequence are clearly visible in the electron density maps. Both models have good stereochemistry as analyzed with PROCHECK.<sup>7</sup> Data collection and refinement statistics for both structures were shown in Table 1.

**Table S1** Strains and plasmids used and generated in this study.

| Strains/Plasmids         | Characteristic(s)                                                                                   | Sources    |
|--------------------------|-----------------------------------------------------------------------------------------------------|------------|
| <b>Strains</b>           |                                                                                                     |            |
| <i>Escherichia coli</i>  |                                                                                                     |            |
| DH5α                     | Host strain for cloning                                                                             | Invitrogen |
| BL21(DE3)                | Host strain for protein expression                                                                  | Novagen    |
| BW25113                  | Host strain for PCR targeting                                                                       | 8          |
| ET12567                  | Donor strain for conjugation                                                                        | 9          |
| <i>Actinoalloteichus</i> |                                                                                                     |            |
| WH1-2216-6               | Wild type, caerulomycin A producer                                                                  | 10         |
| CRM01                    | The <i>crmG</i> gene disrupted mutant of WH1-2216-6                                                 | 11         |
| CRM11                    | The <i>crmK</i> gene disrupted mutant of WH1-2216-6                                                 | 12         |
| <b>Plasmids</b>          |                                                                                                     |            |
| pET28a                   | Km <sup>r</sup> , expression vector                                                                 | Stratagene |
| pIJ773                   | Apr <sup>r</sup> , source of <i>aac(3)/IV</i>                                                       | 13         |
| pUZ8002                  | Km <sup>r</sup> , including <i>tra</i> for conjugation                                              | 14         |
| pCSG2016                 | Strain WH1-2216-6 genomic library cosmid                                                            | 12         |
| pCSG2102                 | pCSG2016 derivative where <i>crmG</i> was disrupted by <i>aac(3)/IV</i>                             | This study |
| pCSG2201                 | 1.58kb <i>crmG</i> <i>NdeI/EcoRI</i> PCR fragment from genomic DNA of strain WH1-2216-6 into pET28a | This study |
| pCSG2218                 | 1.5kb <i>crmK</i> <i>EcoRI/XhoI</i> PCR fragment from genomic DNA of strain WH1-2216-6 into pET28a  | This study |
| pCSG2229                 | pCSG2218 containing site-directed mutagenesis at H64A                                               | This study |
| pCSG2230                 | pCSG2218 containing site-directed mutagenesis at C124A                                              | This study |
| pCSG2231                 | pCSG2218 containing site-directed mutagenesis at F123A                                              | This study |
| pCSG2236                 | pCSG2218 containing site-directed mutagenesis at Y138F                                              | This study |
| pCSG2237                 | pCSG2218 containing site-directed mutagenesis at I328A                                              | This study |
| pCSG2238                 | pCSG2218 containing site-directed mutagenesis at R340A                                              | This study |
| pCSG2240                 | pCSG2218 containing site-directed mutagenesis at E376A                                              | This study |
| pCSG2241                 | pCSG2218 containing site-directed mutagenesis at I378A                                              | This study |
| pCSG2243                 | pCSG2218 containing site-directed mutagenesis at F403A                                              | This study |
| pCSG2244                 | pCSG2218 containing site-directed mutagenesis at F403E                                              | This study |
| pCSG2245                 | pCSG2218 containing site-directed mutagenesis at M405A                                              | This study |
| pCSG2246                 | pCSG2218 containing site-directed mutagenesis at Y446F                                              | This study |
| pCSG2247                 | pCSG2218 containing site-directed mutagenesis at Y449F                                              | This study |
| pCSG2248                 | pCSG2218 containing site-directed mutagenesis at H64A/C124A                                         | This study |
| pCSG2250                 | pCSG2218 containing site-directed mutagenesis at Y449F/Y138F                                        | This study |
| pCSG2252                 | pCSG2218 containing site-directed mutagenesis at Y449F/F403E                                        | This study |

**Table S2** Primers used in this study.

| Primers                     | Sequences                                      | Usage                         |
|-----------------------------|------------------------------------------------|-------------------------------|
| For gene expression         |                                                |                               |
| CrmK-EF                     | 5' - GTGCGAATTCATGCCAACCCGAGCG - 3'            | <i>crmK</i> expression        |
| CrmK-ER                     | 5' - TCGTCTCGAGTTCACCGAGGACGGAT - 3'           |                               |
| For <i>crmK</i> mutagenesis |                                                |                               |
| H64AF                       | 5' - CCGTGCCTCCGGTGGGGCCTGCGGGGAGGCGTT - 3'    | <i>crmK</i> H64A mutagenesis  |
| H64AR                       | 5' - GCCCACCGGAGCGCACGGTGTAGGCGCTTGCC - 3'     |                               |
| F123AF                      | 5' - ACGTTCCTCCGGCGGTGCGTGCATGGGGTTCG - 3'     | <i>crmK</i> F123A mutagenesis |
| F123AR                      | 5' - GCACCGCGGGGAACGTCACCCGTTAGTT - 3'         |                               |
| C124AF                      | 5' - CGTTCCCGGCGGTTTCGCCATGGGGTTCGGG - 3'      | <i>crmK</i> C124A mutagenesis |
| C124AR                      | 5' - GCGAAACCGCCGGGAACGTCACCCGTTAGTT - 3'      |                               |
| Y138FF                      | 5' - ACATCTCCGGTGGGGGCTTCGGGCGCTCTCG - 3'      | <i>crmK</i> Y138F mutagenesis |
| Y138FR                      | 5' - AAGCCCCACCGGAGATGTGGCCGCCGCC - 3'         |                               |
| I328AF                      | 5' - CGACCAGCCAGCTGTTGGCGGCCCGACGTGGGG - 3'    | <i>crmK</i> I328A mutagenesis |
| I328AR                      | 5' - GCCGCCAACAGCTGGCTGGTCGCCAACACGGCAAC - 3'  |                               |
| R340AF                      | 5' - CGGGTGCATCGGGGTGCGGGCGGAAGGTCAAGTCC - 3'  | <i>crmK</i> R340A mutagenesis |
| R340AR                      | 5' - GCCCGCACCCCGATCGCACCCGGCCCCACGTCCG - 3'   |                               |
| E376AF                      | 5' - ACTGCCCGAGCGCCGCGATGGCGTACATCGCTAC - 3'   | <i>crmK</i> E376A mutagenesis |
| E376AR                      | 5' - GCCATCGCGCGCTGGGGCAGTGGTAGTCGGCCC - 3'    |                               |
| I378AF                      | 5' - GCGCCGCGATGGAGTACGCCGCTACGGCGGG - 3'      | <i>crmK</i> I378A mutagenesis |
| I378AR                      | 5' - GCGTACTCCATCGCGCGCTGGGGCAGTGGTA - 3'      |                               |
| F403AF                      | 5' - GCGGGGCGTCTGTTGAAGACCGCCTACATGGTGGC - 3'  | <i>crmK</i> F403A mutagenesis |
| F403AR                      | 5' - GCGGTCTTCAACGACGCCCGCGGGGAACCGCCGT - 3'   |                               |
| F403EF                      | 5' - GCGGGGCGTCTGTTGAAGACCGAGTACATGGTGGCG - 3' | <i>crmK</i> F403E mutagenesis |
| F403ER                      | 5' - CTCGGTCTTCAACGACGCCCGCGGGGAACCGCCGT - 3'  |                               |
| M405AF                      | 5' - CGTCGTTGAAGACCTTCTACGCGGTGGCGTGGACC - 3'  | <i>crmK</i> M405A mutagenesis |
| M405AR                      | 5' - GCGTAGAAGGTCTTCAACGACGCCCGCGGGGAA - 3'    |                               |
| Y446FF                      | 5' - AGGTCAACACGGGCGCCTACATCAACTACCC - 3'      | <i>crmK</i> Y446F mutagenesis |
| Y446FR                      | 5' - AAGCGCCCGTGTGACCTCGTCGGGGGTGGG - 3'       |                               |
| Y449FF                      | 5' - ACGGGCGCCTACATCAACTTCCCGGACATCGAC - 3'    | <i>crmK</i> Y449F mutagenesis |
| Y449FR                      | 5' - AAGTTGATGTAGGCGCCCGTGTGACCTCGTC - 3'      |                               |







**Fig. S2** SDS-PAGE analysis of the purification of CrmK.

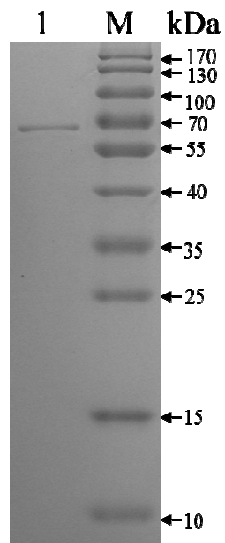

The expression and purification of N-His<sub>6</sub>-tagged CrmK in *E. coli* BL21(DE3)/pCSG2218. Lane 1, purified CrmK protein; Lane M, protein molecular weight marker. The acrylamide percentage of SDS-PAGE gels is 10 %.

**Fig. S3** LC-MS characterization of products of CrmK reactions with CRM P 7.

**(A)** LC-MS spectra of the product CRM O 3

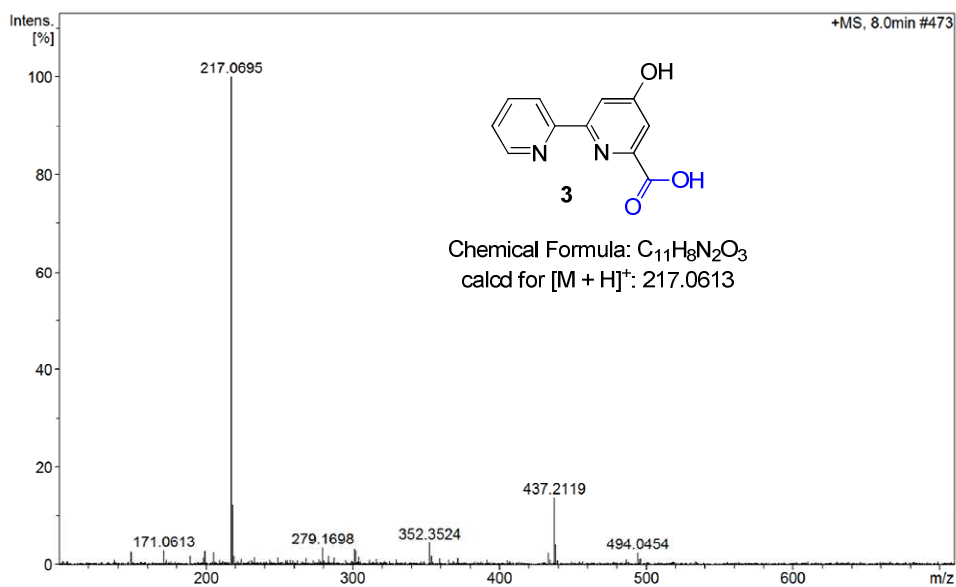

**(B)** LC-MS spectra of the product CRM M 4

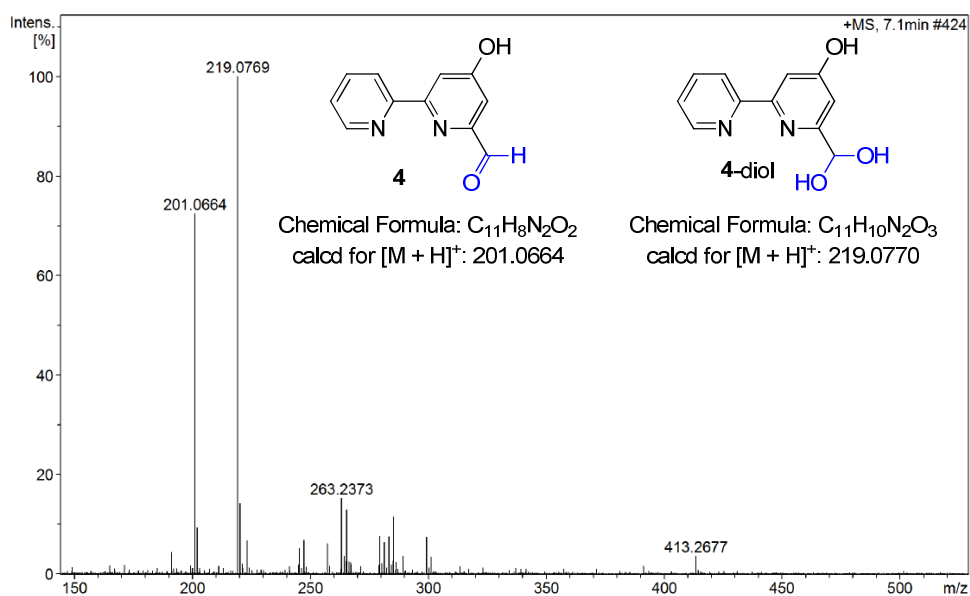

**Fig. S4**  $^1\text{H}$  and  $^{13}\text{C}$  NMR spectroscopic data for CRM R 10.

**(A)** The HRESIMS spectrum of CRM R 10.

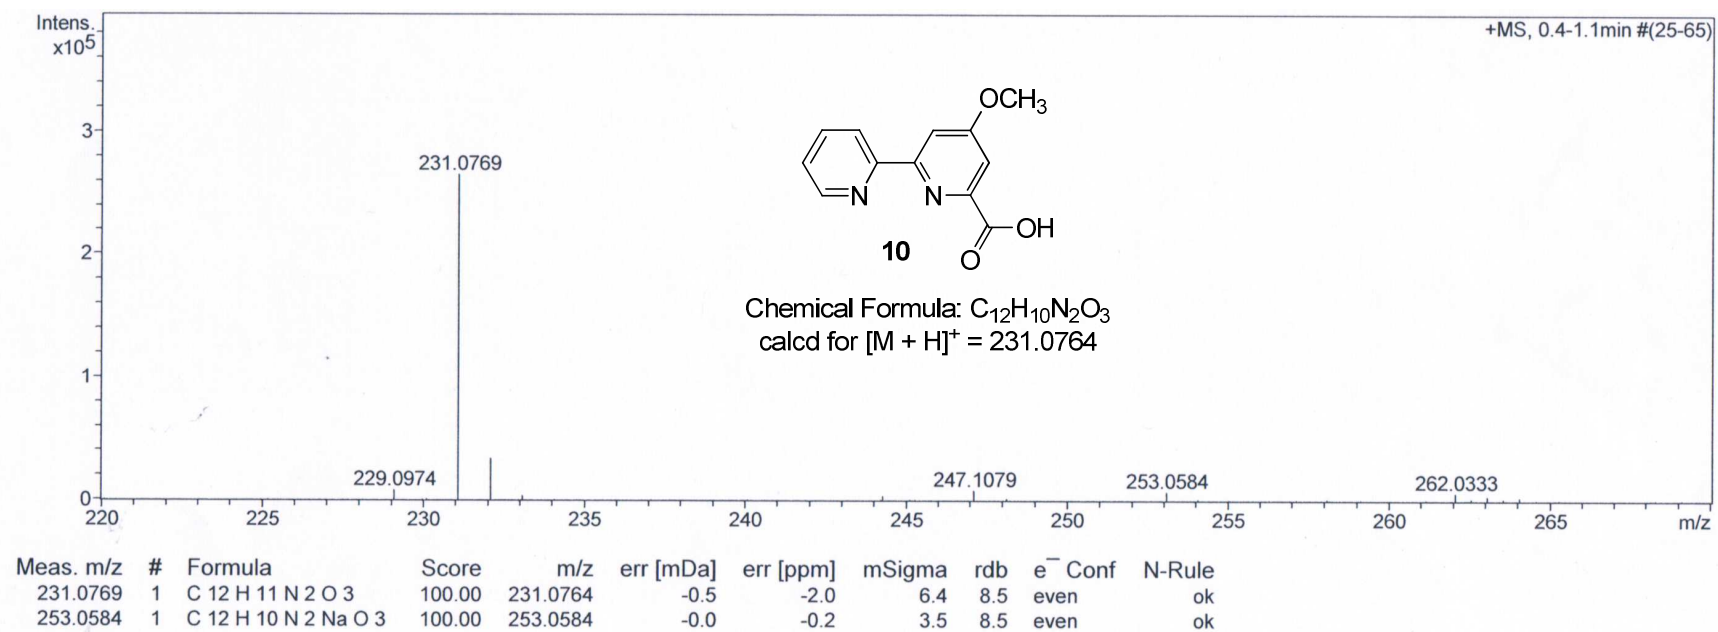

(B) The  $^1\text{H}$  NMR spectrum of CRM R 10 in DMSO- $d_6$

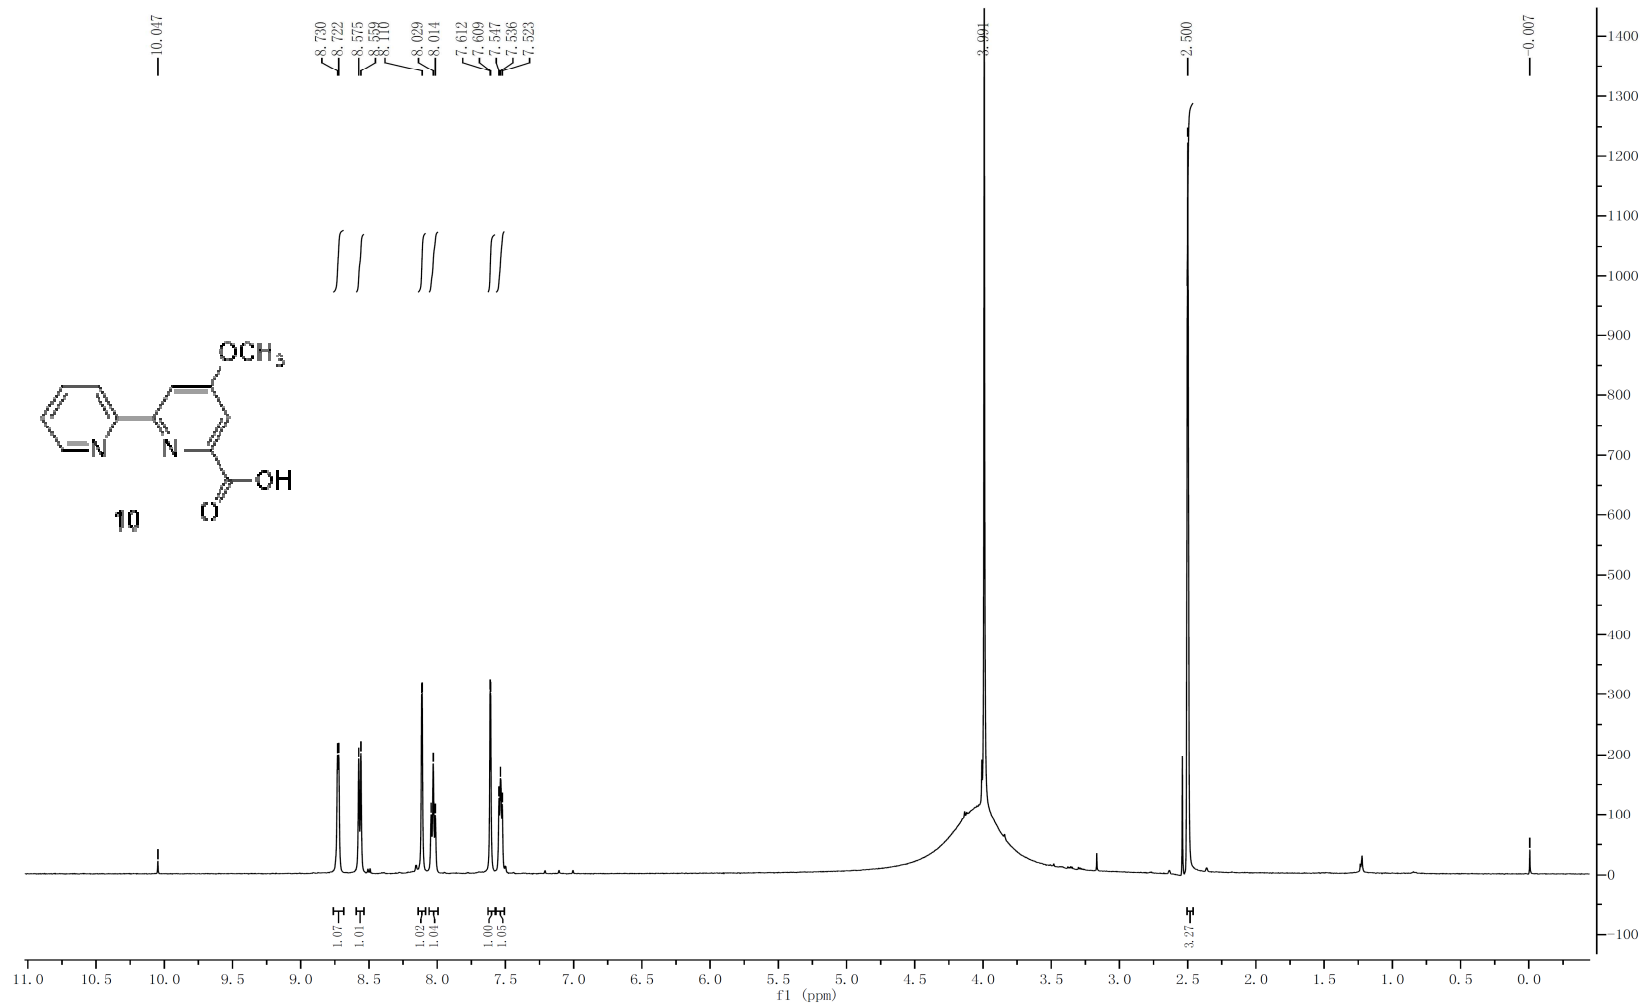

(C) The  $^{13}\text{C}$  NMR spectrum of CRM R **10** in  $\text{DMSO-}d_6$

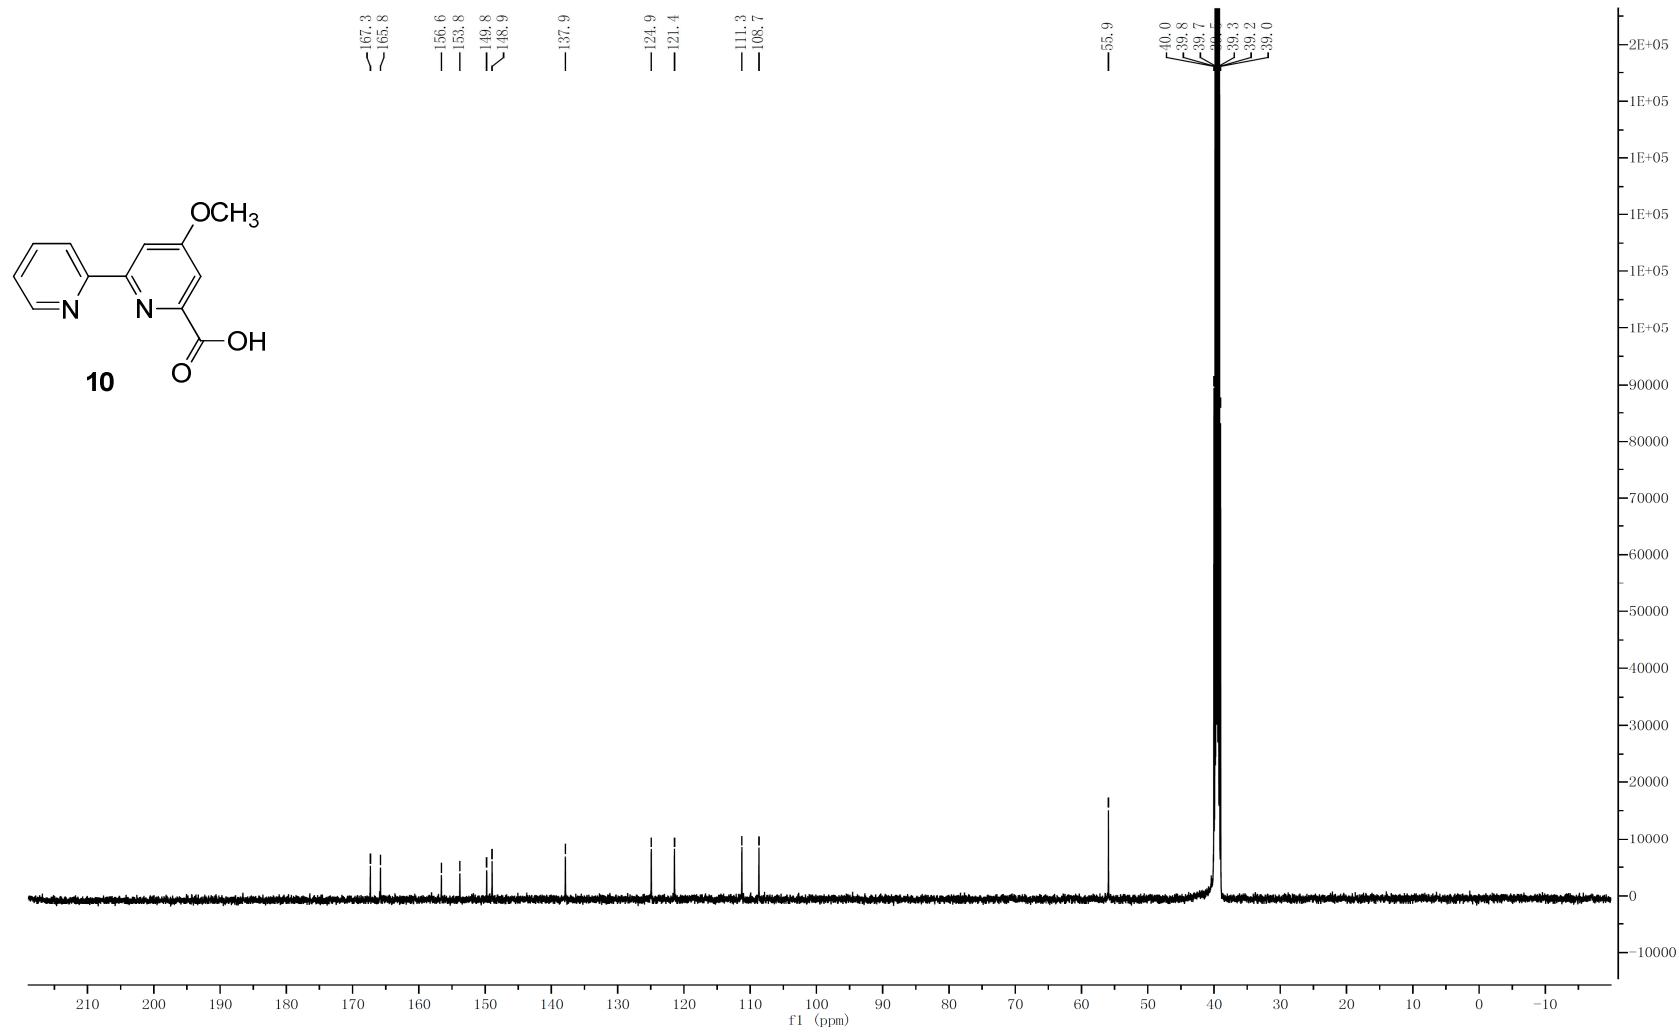

**Fig. S5** Conformational change of Tyr449 in CrmK upon substrate binding.

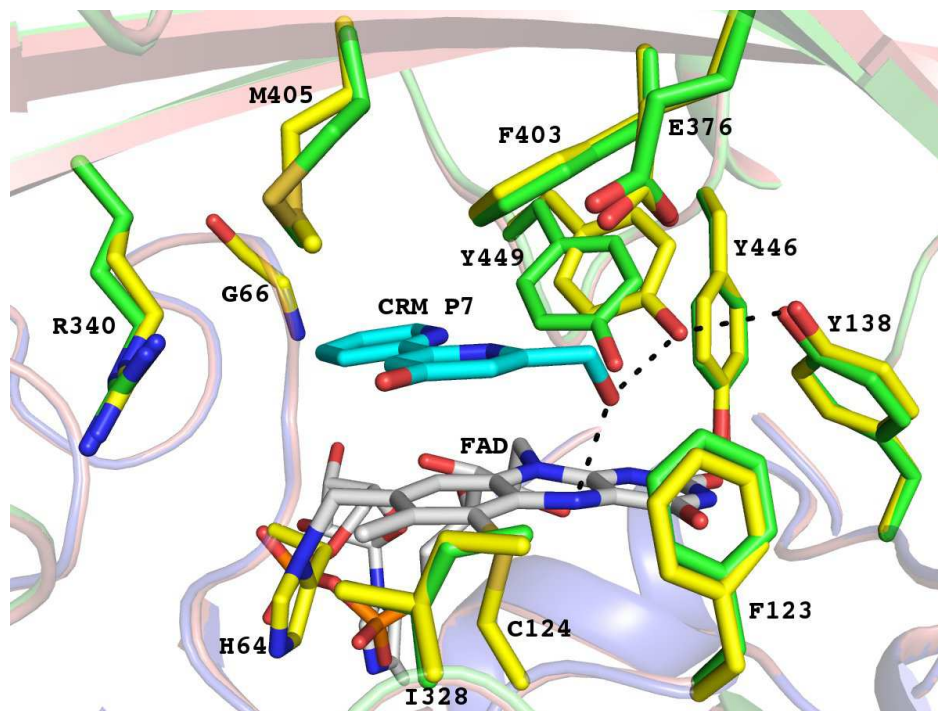

The carbon atoms of the residues lining the active site are colored in green and yellow, respectively, in the apo and substrate-bound form. The only major conformational change in CrmK upon the substrate binding is the swing of  $\sim 16^\circ$  of the Y449 side chain to accommodate the substrate molecule, leading to a  $\sim 1.5$  Å displacement of the Y449 hydroxyl group to enable an H-bond (2.6-3.0 Å) formation with the Y138 hydroxyl group, which is not found in the apo CrmK ( $\sim 4$  Å).



**Fig. S6** MS data of CRM M 4 dissolved in H<sub>2</sub>O or H<sub>2</sub><sup>18</sup>O.

**(A)** Mass spectra of compound CRM M 4 in H<sub>2</sub>O solution

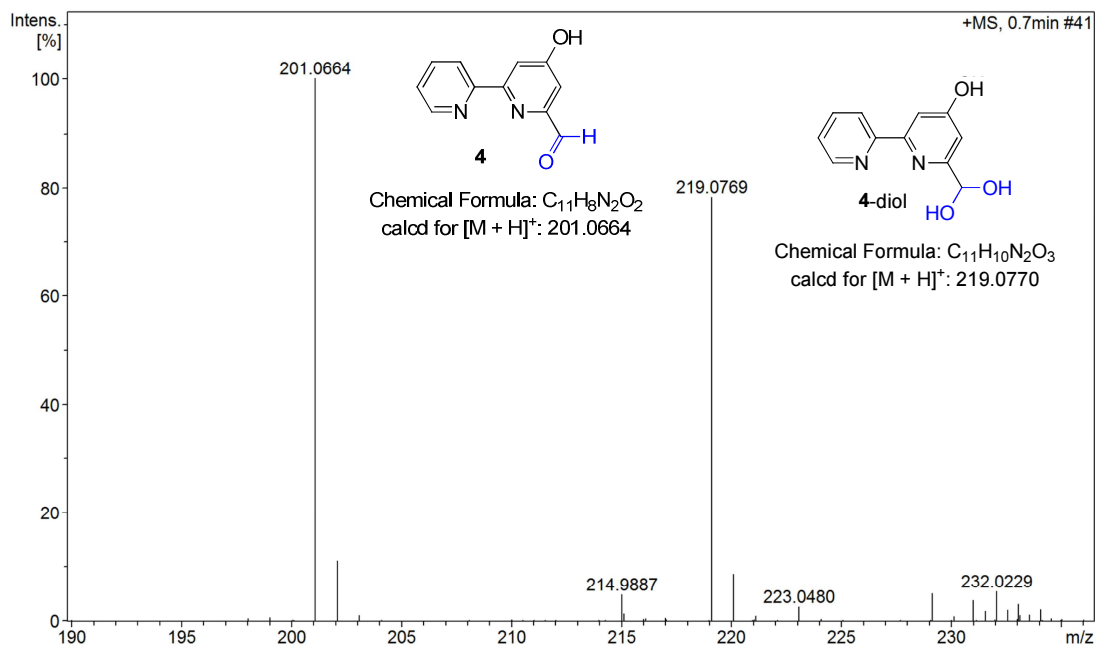

**(B)** Mass spectra of compound CRM M 4 in H<sub>2</sub><sup>18</sup>O (97% purity) solution

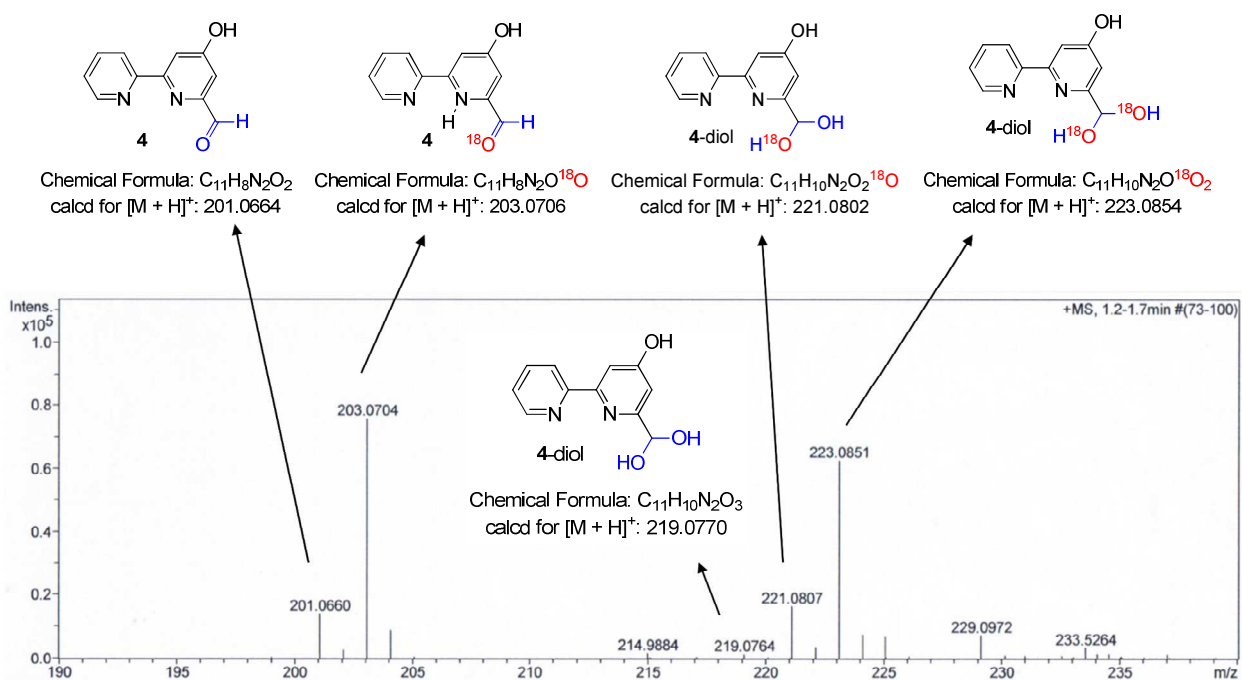

(C) LC-MS spectra of CrmK enzymatic activity of compound CRM P 7 in H<sub>2</sub>O solution

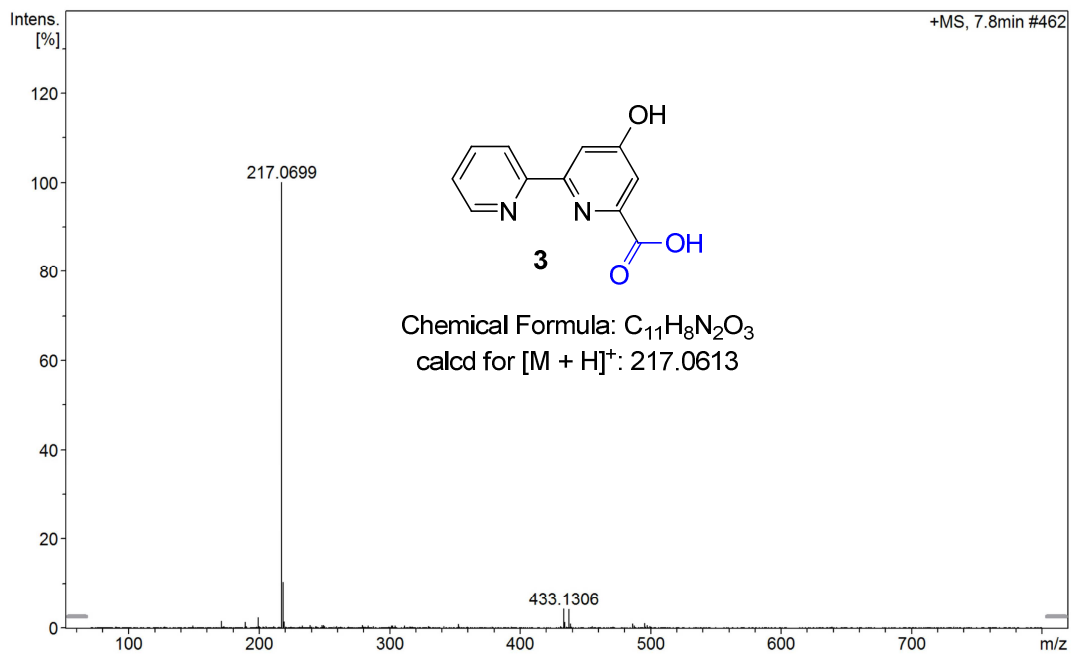

(D) LC-MS spectra of CrmK enzymatic activity of compound CRM P 7 in H<sub>2</sub>O<sup>18</sup> solution

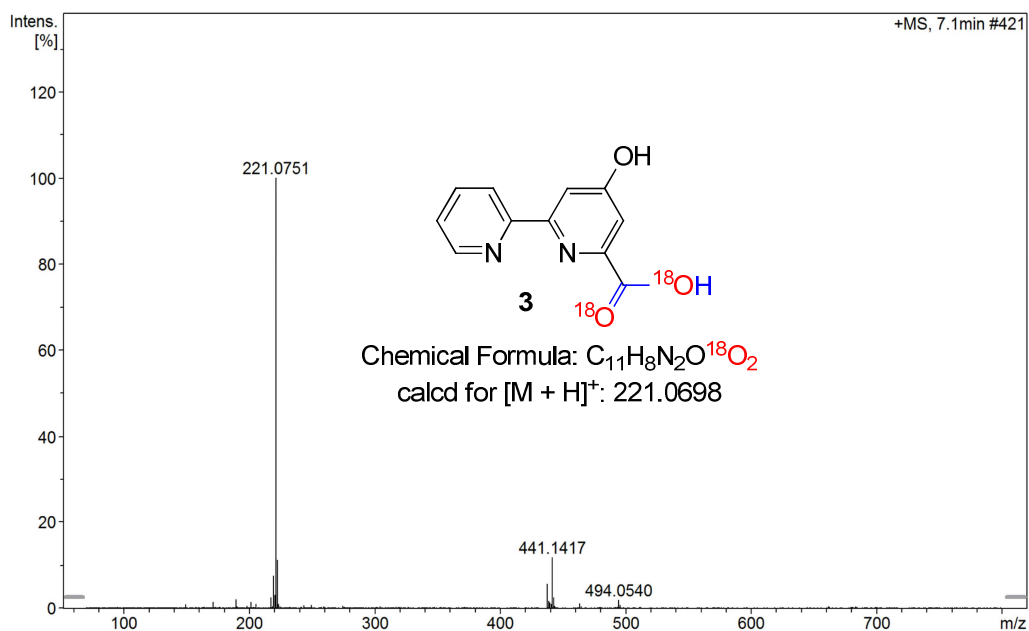

**Fig. S7** Proposed catalytic mechanism with dual active site for AknOx.

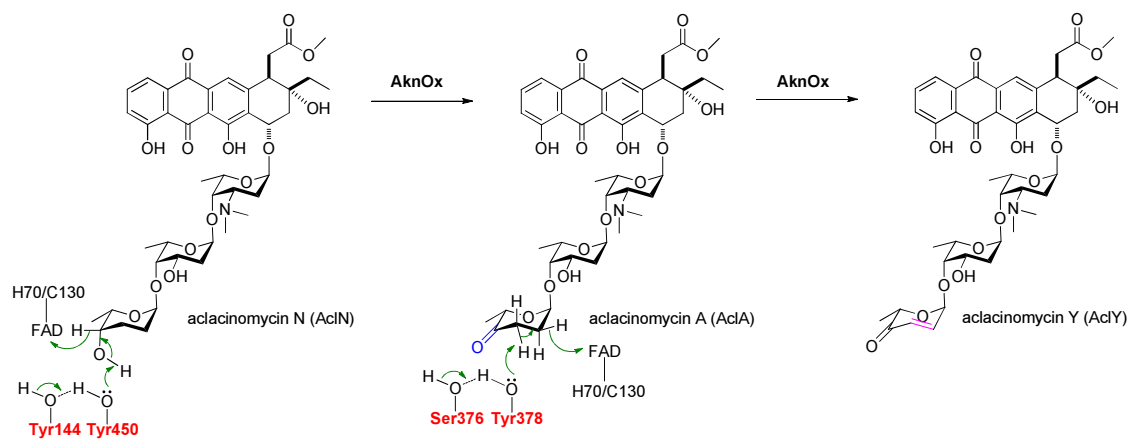

The dual active site (Tyr450/Tyr144, Tyr378/Ser376) was proposed to be responsible to catalyze two different dehydrogenation reactions in AknOx catalysis.<sup>18</sup>

**Fig. S8** Superposition of active site residues in AknOx and CrmK.

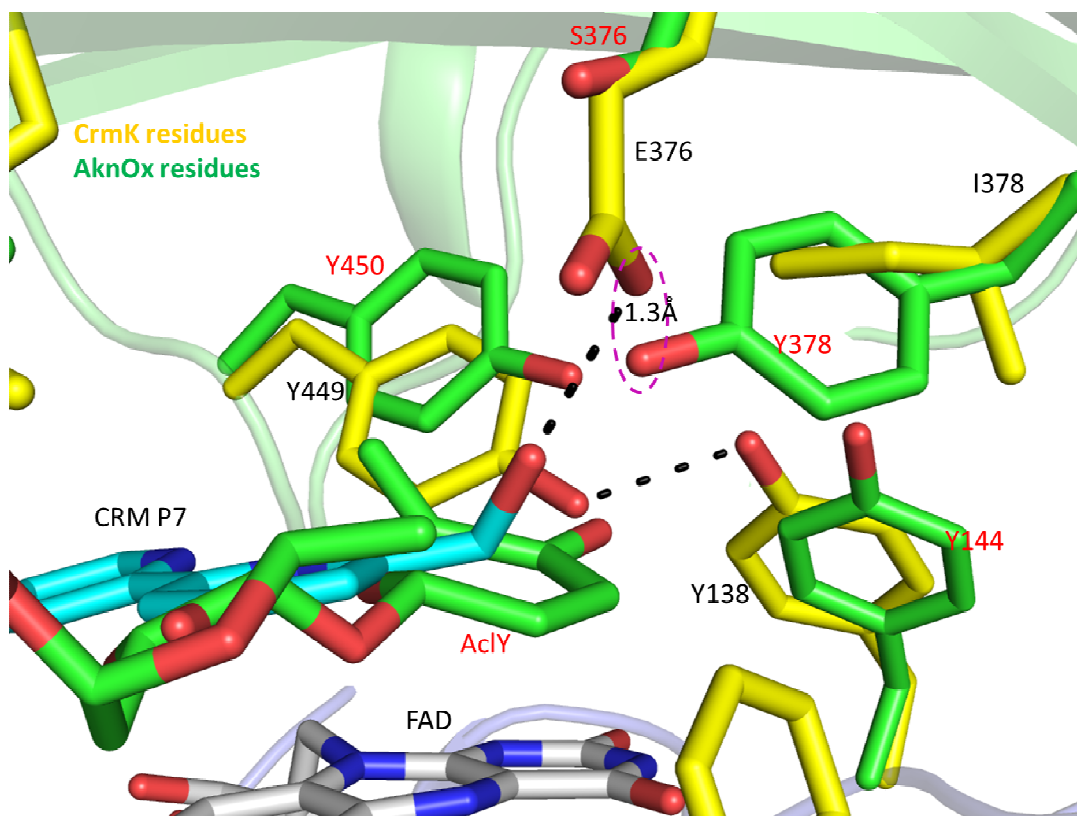

The carbon atoms of catalytic residues in AknOx (Y450/Y144 and Y378)<sup>18</sup> and CrmK (Y449/Y138 and E376) are colored in green and yellow, respectively. The carbon atoms of ligands are shown in cyan and green, respectively. Notably, upon superposition, the carboxylate group of E376 of CrmK is very close ( $\sim 1.3$  Å) to the hydroxyl group of Y378 in AknOx.

**Fig. S9** HPLC analysis of feeding experiments in the  $\Delta crmA$  mutant with **7** and **8**.

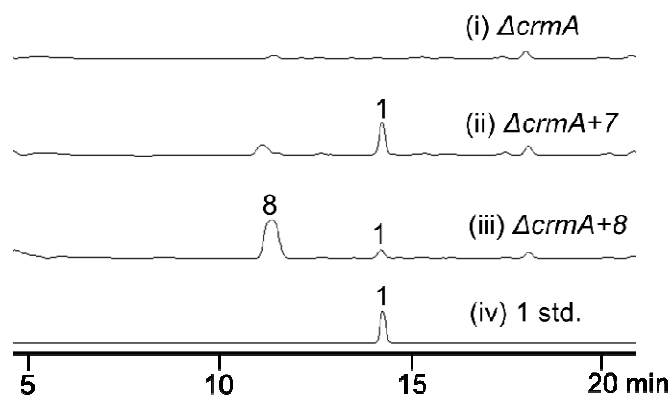

(i) the  $\Delta crmA$  mutant (the CRMs-nonproducing mutant, in which the PKS/NRPS gene *crmA* was disrupted;<sup>12</sup> (ii) the  $\Delta crmA$  mutant was fed with CRM P **7** (30  $\mu$ M); (iii) the  $\Delta crmA$  mutant was fed with CRM F **8** (30  $\mu$ M); (iv) standard **1**.

**Fig. S10** Active site architecture of ClmD2.

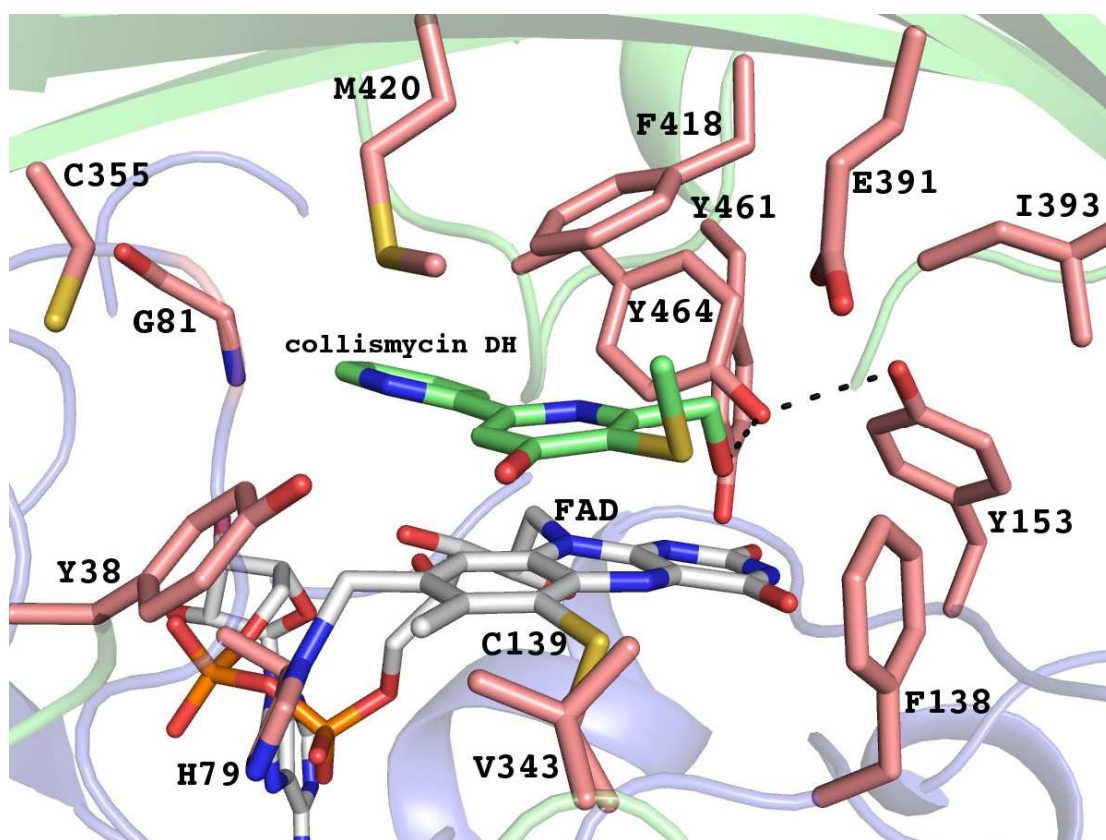

The homology model of ClmD2 was constructed based on the crystal structure of CrmK (68% sequence identity) and the substrate collismycin DH was docked in the active site of ClmD2 using the software MOE.<sup>22</sup> The orientation of active site shown in this figure is similar to that of CrmK presented in the main text. The carbon atoms of active site residues and the substrate are shown in salmon and pale green, respectively. The H-bonds are shown in black dash lines. Among all the residues lining the substrate binding pocket, three residues D23, R340, and I328 in CrmK have been replaced by Y38, C355, and V343, respectively in ClmD2. Notably, the replacement of I328 in CrmK by Val343 in ClmD2 would better accommodate the extra -SCH<sub>3</sub> group on the collismycin DH substrate.<sup>23</sup>

## Supplementary References.

1. M. M. Bradford, *Anal. Biochem.*, 1976, **72**, 248-254.
2. A. G. W. Leslie and H. R. Powell, *Evolving Methods for Macromolecular Crystallography*, 2007, **245**, 41-51.
3. A. Vagin and A. Teplyakov, *J. Appl. Crystallogr.*, 1997, **30**, 1022-1025.
4. J. C. Carlson, S. Y. Li, S. S. Gunatilleke, Y. Anzai, D. A. Burr, L. M. Podust and D. H. Sherman, *Nat. Chem.*, 2011, **3**, 628-633.
5. G. N. Murshudov, A. A. Vagin and E. J. Dodson, *Acta Cryst. D*, 1997, **53**, 240-255.
6. P. Emsley and K. Cowtan, *Acta Cryst. D*, 2004, **60**, 2126-2132.
7. R. A. Laskowski, M. W. Macarthur, D. S. Moss and J. M. Thornton, *J. Appl. Crystallogr.*, 1993, **26**, 283-291.
8. K. A. Datsenko and B. L. Wanner, *Proc. Natl. Acad. Sci. U. S. A.*, 2000, **97**, 6640-6645.
9. D. J. MacNeil, K. M. Gewain, C. L. Ruby, G. Dezeny, P. H. Gibbons and T. MacNeil, *Gene*, 1992, **111**, 61-68.
10. P. Fu, S. Wang, K. Hong, X. Li, P. Liu, Y. Wang and W. Zhu, *J. Nat. Prod.*, 2011, **74**, 1751-1756.
11. Y. Zhu, J. Xu, X. Mei, Z. Feng, L. Zhang, Q. Zhang, G. Zhang, W. Zhu, J. Liu and C. Zhang, *ACS Chem. Biol.*, 2016, DOI: 10.1021/acscchembio.1025b00984.
12. Y. Zhu, P. Fu, Q. Lin, G. Zhang, H. Zhang, S. Li, J. Ju, W. Zhu and C. Zhang, *Org. Lett.*, 2012, **14**, 2666-2669.
13. B. Gust, G. L. Challis, K. Fowler, T. Kieser and K. F. Chater, *Proc. Natl. Acad. Sci. U. S. A.*, 2003, **100**, 1541-1546.
14. M. S. B. Paget, L. Chamberlin, A. Atrih, S. J. Foster and M. J. Buttner, *J. Bacteriol.*, 1999, **181**, 204-211.
15. X. Mo, H. Huang, J. Ma, Z. Wang, B. Wang, S. Zhang, C. Zhang and J. Ju, *Org. Lett.*, 2011, **13**, 2212-2215.
16. Y. C. Liu, Y. S. Li, S. Y. Lyu, L. J. Hsu, Y. H. Chen, Y. T. Huang, H. C. Chan, C. J. Huang, G. H. Chen, C. C. Chou, M. D. Tsai and T. L. Li, *Nat. Chem. Biol.*, 2011, **7**, 304-309.
17. A. Luzhetskyy, A. Mayer, J. Hoffmann, S. Pelzer, M. Holzenkamper, B. Schmitt, S. E. Wohler, A. Vente and A. Bechthold, *ChemBioChem*, 2007, **8**, 599-602.
18. I. Alexeev, A. Sultana, P. Mantsala, J. Niemi and G. Schneider, *Proc. Natl. Acad. Sci. U. S. A.*, 2007, **104**, 6170-6175.
19. H. J. Kim, R. Pongdee, Q. Wu, L. Hong and H. W. Liu, *J. Am. Chem. Soc.*, 2007, **129**, 14582-14584.

20. D. R. Hahn, G. Gustafson, C. Waldron, B. Bullard, J. D. Jackson and J. Mitchell, *J. Ind. Microbiol. Biotechnol.*, 2006, **33**, 94-104.
21. I. Garcia, N. M. Vior, A. F. Brana, J. Gonzalez-Sabin, J. Rohr, F. Moris, C. Mendez and J. A. Salas, *Chem. Biol.*, 2012, **19**, 399-413.
22. *Molecular Operating Environment (MOE)*, 2013.08, Chemical Computing Group Inc., Montreal, Canada.
23. I. Garcia, N. M. Vior, J. Gonzalez-Sabin, A. F. Brana, J. Rohr, F. Moris, C. Mendez and J. A. Salas, *Chem. Biol.*, 2013, **20**, 1022-1032. .
